1 **Cheater-mediated evolution shifts phenotypic heterogeneity in *Bacillus subtilis***  
2 **biofilms**

3

4 Marivic Martin<sup>1,2</sup>, Anna Dragoš<sup>1</sup>, Daniel Schäfer<sup>2</sup>, Gergely Maróti<sup>3</sup>, and

5 Ákos T. Kovács<sup>1,2</sup>

6

7 <sup>1</sup> Bacterial Interactions and Evolution Group, Technical University of Denmark, 2800 Kongens

8 Lyngby, Denmark

9 <sup>2</sup> Terrestrial Biofilms Group, Friedrich Schiller University Jena, 07743 Jena, Germany

10 <sup>3</sup> Institute of Plant Biology, Biological Research Center of the Hungarian Academy of Sciences,

11 3600 Szeged, Hungary

12

13 Corresponding Author: Ákos T. Kovács

14 Bacterial Interactions and Evolution Group, Technical University of Denmark, 2800 Kongens

15 Lyngby, Denmark; [atkovacs@dtu.dk](mailto:atkovacs@dtu.dk); +45 45252527

16

17 Keywords: *Bacillus subtilis*, biofilm, phenotypic heterogeneity, experimental evolution,

18 exopolysaccharide

## 19 **ABSTRACT**

20 Biofilms are closely packed cells held and shielded by extracellular matrix composed of structural  
21 proteins and exopolysaccharides (EPS). As matrix components are costly to produce and shared  
22 within the population, EPS-deficient cells can act as cheaters by gaining benefits from the  
23 cooperative nature of EPS producers. Remarkably, genetically programmed EPS producers can  
24 also exhibit phenotypic heterogeneity at single cell level. For instance, mature biofilms of *Bacillus*  
25 *subtilis* contain cells in an 'ON' state, expressing extracellular matrix genes, as well as cells in an  
26 'OFF' state. Previous studies have shown that spatial structure of biofilms limits the spread of  
27 cheaters, but the long-term influence of cheating on biofilm evolution is not well understood. In  
28 addition, the influence of cheats on phenotypic heterogeneity pattern within matrix-producers,  
29 was never examined. Here, we describe the long-term dynamics between EPS producers  
30 (cooperators) and non-producers (cheaters) in *B. subtilis* biofilms and track changes in  
31 phenotypic heterogeneity of matrix production within the populations of co-operators. We  
32 discovered that cheater-mediated evolution in pellicles leads to a transient shift in phenotypic  
33 heterogeneity pattern of co-operators, namely an increased number of *eps* expressing cells as  
34 depicted by hyper ON phenotype. Although hyper ON strategy seems adaptive in presence of  
35 cheats, it is soon substituted by hyper OFF phenotype and/or soon after by population collapse.  
36 This study provides additional insights on how biofilms adapt and respond to stress caused by  
37 exploitation in long-term scenario.

38

## 39 **SIGNIFICANCE STATEMENT**

40 Microbial biofilms are significant in medical, environmental and industrial settings. Biofilm  
41 control strategies have been proven to be challenging due to their increased resistance to  
42 antimicrobials. Here, we employ a cheater-mediated evolution study in *Bacillus subtilis* pellicles  
43 to understand in long-term scale how biofilms' social behavior evolves as triggered by stress. We  
44 show that evolution of matrix-producing cells (cooperators) in the presence of non-producers

45 (cheaters) leads to a cheating strategy that allows cheaters to benefit from cooperators, that  
46 subsequently result to population tragedy. However, cooperators can also adapt and evade  
47 exploitation via an anti-cheating system that involves shift in phenotypic heterogeneity related  
48 to biofilm matrix expression. This study highlights biofilm adaptation and stress response  
49 mechanisms within the context of evolution.

50

## 51 **INTRODUCTION**

52 Cooperative interactions are prevalent for all life forms (1), even for simple microbes that often  
53 exist in communities of matrix bound surface-attached cells called biofilms (2–6). However, when  
54 costly products such as siderophores (7, 8), extracellular polymeric substances (9, 10), digestive  
55 enzymes (11), and signaling molecules (12, 13) are secreted and shared, cooperative behavior  
56 becomes susceptible to cheating (2, 14–16), where mutants defective in cooperation can still  
57 benefit from cooperative community members (4, 5, 17). It has been shown that spatially  
58 structured biofilms, where interactions with clonemates are common and diffusion of public  
59 goods is limited, may serve as natural defense against cheating (18–20). However, long time scale  
60 studies have recently reported that biofilm defectors can spontaneously emerge and spread in  
61 biofilms by exploiting other matrix-proficient lineages (21–24). In fact, a pioneering microbial  
62 evolution study on *Pseudomonas fluorescens* has already pointed towards dynamic evolutionary  
63 interplay between cooperation and exploitation in biofilm mats (25), where emergence of  
64 cellulose overproducer (Wrinkly) allowed matt formation, but also created an opportunity for  
65 exploitation by non-producers (Smooth), eventually leading to so called ‘tragedy of the  
66 commons’ (4, 26, 27).

67 Taken together, biofilms are suitable model to understand social interactions in an evolutionary  
68 time scale (23, 28–31). Modelling and empirical data confirm that mutualism (beneficial to both  
69 actor and recipient) and altruism (beneficial to recipient but not to actor) play crucial role in  
70 biofilm enhancement (32) but at the same time can lead to biofilm destabilization (25). Can

71 cooperators evolve tactics to evade exploitation and in turn, can cheats utilize evolution to  
72 enhance their selfish actions?

73 Recent studies showed that in well-mixed environment, cooperators adapt to cheats by reducing  
74 cooperation (14, 15, 33). Such reduction could be achieved by various strategies, for instance  
75 decrease in motility (15), down regulation or minimal production in public goods (14, 15, 33), up-  
76 regulation of other alternative public goods (14), or bi-stable expression in virulence gene (2).  
77 Interestingly, populations of cooperators often exhibit phenotypic heterogeneity at the single  
78 cell level (34, 35). Therefore, an alternative and simple mechanism to modulate levels of  
79 cooperation in a population, would be through changes in phenotypic heterogeneity pattern.  
80 However, the long-term effects of cheats on costly goods' expression at individual cell level have  
81 never been examined. Understanding how heterogeneity of gene expression within the  
82 population is affected in the presence of cheats would provide better insight on microbial  
83 adaptation and stress response mechanisms.

84 Here, we address this question using pellicle biofilm model of *Bacillus subtilis*. Pellicle formation  
85 in *B. subtilis* involves, amongst others, aerotaxis driven motility and subsequent matrix  
86 production (36). Aerotaxis is important for oxygen sensing to aid cells reach the surface, while  
87 matrix formation is significant to sustain cells to adhere to the surface and to each other.  
88 Exopolysaccharide (EPS) is a costly public good in *Bacillus subtilis* biofilms (10, 18, 37) and is  
89 heterogeneously expressed during biofilm formation with approximately 40% of cells exhibiting  
90 the ON state (37, 38). We aimed to investigate the long-term dynamics between EPS producer  
91 (cooperator) and EPS deficient (cheater) cells and assess cheat-dependent alteration related to  
92 phenotypic heterogeneity in *eps* expression by the producer.

93 We reveal, that initial cheating mitigation by the EPS producers involves shift in phenotypic  
94 heterogeneity towards increased frequency of *eps*-expressing cells, which is achieved by loss-of-  
95 function mutation in a single regulatory gene. We also demonstrate, that although 'hyper ON'  
96 phenotype helps to reduce cheating, it is rapidly replaced by hyper OFF strategy, which,

97 combined with certain mutations in EPS deficient strain, results in tragedy of the commons and  
98 population collapse. Our study uncovers an alternative anti-cheating mechanism based on  
99 changes in phenotypic heterogeneity and highlights meandering trajectories prior cooperation  
100 collapse.

101

## 102 **RESULTS**

103

### 104 **Long-term cheating in pellicle biofilms leads to population collapse**

105 Exopolysaccharide EPS is one of the major components of *B. subtilis* biofilm matrix and mutants  
106 deficient in EPS production ( $\Delta eps$ ) are not able to form pellicle biofilms (*SI Appendix*, Fig. S1A and  
107 S1B). Since it was previously demonstrated that EPS can be shared (10, 18, 37), we predicted that  
108  $\Delta eps$  would be able to take advantage of EPS-producing wild type (WT) and incorporate into the  
109 pellicle biofilm. Indeed, when co-cultivated with the WT (at 1:1 initial ratio), the  $\Delta eps$  became  
110 part of the pellicle with negative impact on WT productivity (*SI Appendix*, Fig. S1b). In addition,  
111 presence of the mutant resulted in decreased level of surface complexity as typical wrinkly  
112 structures were absent in the mixed pellicle (*SI Appendix*, Fig. S1a). These results reveal that the  
113  $\Delta eps$  serves as cheater in the pellicle biofilms by taking advantage of the EPS producer strain.

114 In order to examine long-term population dynamics in co-culture of EPS producers (wild type-  
115 WT) and cheats ( $\Delta eps$ ), we allowed 8 parallel pellicle populations of  $\Delta eps$ +WT to evolve for 35  
116 cycles (~200 generations) starting at 1:1 initial ratio. Every 5<sup>th</sup> transfer, we determined relative  
117 frequencies (%) of both strains in the pellicles using plate count assay (CFU/ml). The results  
118 revealed that cheats were able to outnumber the producer strain, eventually leading to  
119 decreased productivity of the entire population, as pellicle formation was no longer possible  
120 (Fig. 1). Such scenario was observed in 6 out of 8 populations and will be referred to as  
121 population collapse (Fig. 1). Evolutionary time points when a collapse occurred varied among  
122 the population, for instance in population 1 and 7, the collapse was observed after 30<sup>th</sup> transfer

123 while in population 2 it took place already after 10<sup>th</sup> transfer. No collapse was observed for  
124 populations 5 and 8, where cheats coexisted with WT until the end of the evolution cycle (35<sup>th</sup>).  
125 We also observed different patterns of how productivity of the WT changed when evolved in  
126 the presence of cheats (Fig. 1). A “decline-collapse” trend was noticed for populations 2, 3 and  
127 4, wherein the WT continuously declined and then proceeded to population collapse after 5<sup>th</sup>,  
128 15<sup>th</sup> and 10<sup>th</sup> transfers, respectively. For populations 1, 6 and 7, we witnessed a “decline-  
129 recovery-collapse” pattern. Finally, we detected a “decline-recovery-no collapse” model for  
130 populations 5 and 8, wherein the populations after recovering from an early decline persisted  
131 until 35<sup>th</sup> transfer.

132

### 133 **‘Hyper ON’ matrix producers emerge during evolution with cheats**

134 Previous studies have shown that cooperators can adapt to presence of cheats for example by  
135 decreasing the amount of released public goods and therefore minimizing cheating opportunities  
136 (2, 14, 15). As *B. subtilis* exhibits phenotypic heterogeneity in *eps* matrix gene expression (37, 38)  
137 (*SI Appendix*, Fig. S2), we investigated how such heterogeneous expression is influenced by the  
138 presence of cheats in an evolutionary perspective. Using confocal laser scanning microscopy,  
139 qualitative assessment of randomly selected isolates revealed that early populations of the EPS  
140 producers (5-10 transfer) which co-evolved with cheats exhibited a so called hyper ON  
141 phenotype, where the fraction of *eps* expressing cells was largely increased as compared to the  
142 ancestral strain (*SI Appendix*, Fig. S2). On the contrary, evolution in the absence of  $\Delta eps$  mostly  
143 resulted in hyper OFF phenotype, with larger amounts of cells that do not express *eps*. To further  
144 verify this phenomenon, we quantified the average  $P_{eps}$ -GFP intensity of 95 single isolates per  
145 each WT population (see methods) (Fig. 2). The results revealed major changes in distribution of  
146  $P_{eps}$ -GFP intensity across the evolved and co-evolved WT populations as compared to the WT  
147 ancestor (Fig. 2). Specifically, for all WTs evolved alone, the distributions narrowed and  
148 dramatically shifted to the left, so that the clear majority of isolates matched the hyper OFF

149 category across the entire evolutionary time (5-35<sup>th</sup> transfer) (Fig. 2.). On the contrary, in some  
150 co-evolved WT populations (population 3, 5 and 7) the distributions widened at the 10<sup>th</sup> transfer  
151 (Fig. 2), resulting in increased frequency of hyper ON isolates (Fig. 2). A transient increase of  
152 hyper ON phenotype frequency appeared rather temporary, as it was followed by dramatic  
153 increase in frequency of hyper OFF phenotype in later evolutionary time points (Fig. 2.).

154

### 155 **Mutations in *rsiX* lead to Hyper ON phenotype**

156 To unravel the genetic basis of the hyper ON phenotype that evolved in presence of cheats,  
157 several single isolates from the evolved populations were subjected to genome resequencing  
158 (for details see methods). The comparative analysis of sequencing data revealed that the WT  
159 isolates that co-evolved with cheats and exhibited the hyper ON phenotype, shared mutations  
160 in *rsiX* gene (*SI Appendix*, Dataset S1). The *rsiX* gene encodes for an anti-sigma factor that controls  
161 the activity of extracellular cytoplasmic function (ECF) sigma factor X which is involved in cationic  
162 antimicrobial peptide resistance important for cell envelope stress response (39). Detected  
163 mutations resulted either in substitution of Valine 106 to Alanine or frameshift mutations in  
164 Serine 104 or Isoleucine 347 that could lead to change or loss of anti-SigX function. Indeed, we  
165 were able to recreate the evolved hyper ON phenotype in the pellicle solely by deleting the *rsiX*  
166 gene in the WT ancestor (Fig. 3C). Interestingly, a different type of frameshift mutation in Lysine  
167 200 was found in one population of evolved WT alone but this population demonstrated a hyper  
168 OFF phenotype (Fig. 3A), suggesting that only certain types of mutations in *rsiX* lead to the  
169 increase in number of *eps* expressing cells in the population or additional mutations have  
170 antagonistic effects in this isolate.

171

### 172 **Mutation in *rsiX* contributes to competitive advantage of producer strains against cheats**

173 As mutation in *rsiX* resulted in hyper ON phenotype that may be linked to elevated secretion of  
174 EPS, we hypothesized that  $\Delta$ *rsiX* producers could support the spread of cheats and contribute to

175 population collapse scenario (Fig.1). To better understand how ancestor WT and  $\Delta rsiX$  interact  
176 with  $\Delta eps$ , we cultivated the  $\Delta eps$  in presence of EPS-containing supernatants obtained from the  
177 WT and  $\Delta rsiX$  (*SI Appendix*, Fig. S4). Both supernatants could partially restore pellicle formation  
178 by  $\Delta eps$  resulting in similar productivities of  $\Delta eps$ , thereby not supporting our hypothesis on  
179 improved performance of the mutant in presence of hyper ON  $\Delta rsiX$  strain.

180 In order to determine the effect of *rsiX* deletion on fitness of the WT in presence of cheats, we  
181 performed a series of competition assays. Apparently, the  $\Delta rsiX$  showed two-fold increase in  
182 relative frequency (40%) (Fig. 4 and *SI Appendix*, Fig. S5) when competed against the  $\Delta eps$ , as  
183 compared to the WT ancestor (20%).

184 It is worth to mention that we could not detect any significant fitness costs or benefits linked to  
185 *rsiX* deletion in pairwise competition between  $\Delta rsiX$  and WT (*SI Appendix*, Fig. S5; relative fitness  
186 of  $\Delta rsiX$  = 1.00  $\pm$ 0.02 S.D.). Furthermore, we did not observe significant differences in  
187 productivities of WT and the hyper ON  $\Delta rsiX$  mutant, when grown in monoculture pellicles (*SI*  
188 *Appendix*, Fig. S3), suggesting that positive effect of *rsiX* mutation only manifests in presence of  
189 cheats.

190 Relative frequencies of the evolved WT strains carrying hyper ON phenotype and specific  
191 mutations in *rsiX* were even higher (average ranged from 58% to 99%) as compared to  $\Delta rsiX$   
192 carrying ancestral genetic background (Fig. 4, Fig. S6). Remarkably, the significant fitness  
193 improvement of the WT evolved with cheats was already observed in 5<sup>th</sup> transfer and 10<sup>th</sup>  
194 transfer, mutually with an early occurrence of hyper ON phenotype in those populations. This  
195 was not the case for the WT evolved alone at 5<sup>th</sup> transfer (20%), where a remarkable fitness  
196 increase (average ranged from 87% to 94%) could only be observed in later evolutionary time  
197 point (Fig. 4 and *SI Appendix*, Fig. S6). These results suggest that the early improvement in  
198 competitive strategies against cheats are caused by the *rsiX* mutation and other mutations  
199 associated with hyper ON phenotype, while in later evolutionary time points this effect can be  
200 amplified by cheating-independent adaptation to the medium. Interestingly, frequencies of  $\Delta eps$



201 in pellicles formed by the ancestor or evolved matrix producers, did not manifest in productivity  
202 assay (Fig. 4b). These suggests that hyper ON phenotypes are vested on the increase in *eps*-  
203 expressing cells or limiting the spread of cheats but do not result in an increase in total yield.

204

#### 205 ***sinR* mutation negatively affects the competitive advantage of cheats**

206 Interestingly, evolved cheaters that were isolated from the same populations as *rsiX* mutation  
207 containing matrix producers (i.e. populations 3 at 5<sup>th</sup> and 10<sup>th</sup> transfers and 7 at 10<sup>th</sup> and 30<sup>th</sup>  
208 transfers), harbored a *sinR* mutation of an amino acid substitution from Leucine 1 to Tryptophan  
209 (*SI Appendix*, Dataset S1). Therefore, we anticipated that the mutation may influence  
210 competitive fitness of the  $\Delta eps$  against the WT matrix producer. The *sinR* gene encodes for a  
211 transcriptional repressor and biofilm master regulator that controls the operons *epsA-O* and  
212 *tapA-sipW-tasA* for matrix exopolysaccharide and protein component, respectively (40).  
213 Interestingly, our results showed that the evolved  $\Delta eps$  with an ancestor *sinR* ( $\Delta eps$  *sinR*<sup>WT</sup>)  
214 performed better against the WT ancestor as compared to evolved  $\Delta eps$  that carried *sinR*  
215 mutation ( $\Delta eps$  *sinR*<sup>Leu1Trp</sup>) (Fig. 5 and *SI Appendix*, Fig. S7), suggesting that mutation in *sinR* could  
216 prevent the spread of cheats in the evolved populations, especially at early stage of co-evolution  
217 (Fig. 4 and *SI Appendix*, Fig. S6). Interestingly, the impact of *sinR* mutation in  $\Delta eps$  is nearly lost  
218 when WT carries *rsiX* deletion or other adaptive mutations (Fig. 5 and *SI Appendix*, Fig. S7, S8).

219

#### 220 **Population collapse may be linked to adaptive mutations in cheats and loss of *rsiX* mutants in 221 producer populations**

222 To explore possible reasons behind the collapse of certain WT vs  $\Delta eps$  populations, the co-  
223 evolved populations of WTs and  $\Delta eps$  were isolated from selected co-cultures stocks (see  
224 methods) at final evolutionary timepoint (populations 5 and 8) or at last time point prior to  
225 collapse (populations 4 and 6) and subjected to whole genome re-sequencing. Genomic analysis  
226 of  $\Delta eps$  populations that caused early pellicle collapse (pop 4 and 6) revealed several mutations

227 in chemo/aerotaxis genes, namely in *hemAT* (Fig. 6 and *SI Appendix*, Dataset S2) with amino acid  
228 change from Glutamic acid 254 to Lysine and Lysine 131 to Threonine for populations 6 and 4,  
229 respectively. Interestingly, we did not identify any genetic changes in WT from population 4,  
230 suggesting that the collapse was triggered by adaptation of the  $\Delta eps$ . On the other hand, for the  
231 non-collapsed populations (population 5 and 8) the consensus could be observed in the WTs,  
232 which showed mutations in *yvrG* gene (Fig. 6 and *SI Appendix*, Dataset S2) encoding for two-  
233 component histidine kinase involved in cell wall process. Finally, *rsiX* mutation was not detected  
234 neither in the last populations before collapse, with an exemption of population 7 with 1% hyper  
235 ON phenotype (Fig. 2, 6 and *SI Appendix*, Dataset S1), nor at the last transfer point for the non-  
236 collapse, implying that this mutation was lost in parallel with the loss of hyper ON phenotype in  
237 the late populations.

238

## 239 **DISCUSSION**

240 Studies on evolution of cooperative behavior is important to understand how social behaviors  
241 are shaped in longer time scale. Moreover, exploring long term consequences of exposure to  
242 cheating allows to better understand how cooperation prevails in nature where environmental  
243 stress and exploitation exist inherently. Previous evolution studies on cheater-cooperator  
244 interactions in spatially structured environment showed cheater mitigation via minimization of  
245 the cooperative trait (2, 14, 15). On the contrary, here we show that cooperators initially respond  
246 to cheating by intensifying the cooperative behaviors through shift in phenotypic heterogeneity  
247 pattern towards hyper ON phenotype, where, in contrast to the ancestral strain, nearly all  
248 members of the population express the operon involved EPS production. Further molecular  
249 analysis of the hyper ON isolates strongly suggests that this phenotype is triggered by loss-of-  
250 function mutation in *rsiX* gene. The product of *rsiX* represses the activity of ECF sigma factor, SigX  
251 that is involved cell envelope stress response against cationic antimicrobial peptides (41).  
252 Importantly, SigX has been previously shown to induce expression of *epsA-O* in *B. subtilis* via a

253 complex regulatory pathway involving Abh and SlrR (42), explaining the observed enhanced in  
254 *eps* gene expression in *rsiX* mutant. Another example of matrix overproduction via ECF  
255 adaptation was also reported in Gram-negative bacterium *Pseudomonas aeruginosa* where  
256 mutations in another ECF called AlgT led to alginate overproduction and increased resistance to  
257 antimicrobials (43). Therefore, adaptive boosts in matrix production through modulation of ECF  
258 is not exclusive for *B. subtilis* but seems to occur also in medically relevant Gram-negative  
259 pathogens like *P. aeruginosa*.

260 Interestingly, we also observed that *rsiX* mutation carrying matrix producers tend to co-occur  
261 with *sinR*<sup>Leu1Trp</sup> cheaters ( $\Delta eps$ ) (Fig. 6 *SI Appendix*, Dataset S1). SinR is a transcriptional repressor  
262 and master regulator of biofilm (40) and changes in the N terminal of SinR reveal big impact on  
263 its functions (44), we expect that alterations in the first amino acid could provide immense effect  
264 either on translation rate, folding stability or function. We have previously observed that loss-of-  
265 function mutation in  $\Delta eps$  enhances the production of TasA, a protein constituent which is  
266 another essential matrix component (37). Furthermore, biofilm productivity can be maximized  
267 by division of labor between TasA- and EPS-producers (37). We hypothesize that similar  
268 phenomenon might transiently improve productivity of mixed pellicles, where cooperators  
269 overproduced EPS while cheaters overproduced TasA. Alternatively, as TasA carries antimicrobial  
270 properties (45, 46), its increased abundance could trigger stress response in the co-operator,  
271 selecting for *rsiX* mutation. This could explain the synchronous appearance of *rsiX* mutations with  
272 hyper ON phenotypes in evolved cooperators and *sinR* mutations in evolved cheaters.

273 In contrast to previous studies, that addressed long term cheating on diffusible siderophores, we  
274 explored evolutionary interplay between biofilm producers and non-producers in structured  
275 environment. Our results support previous observations on evolution of specific cheating-  
276 resisting mechanisms in co-operators, pointing towards ubiquity of this phenomenon. In  
277 addition, our work brings up two major findings 1) matrix producers can adapt to matrix non-  
278 producers by shifting phenotypic heterogeneity towards increased number of matrix-expressing

279 cells 2) hyper ON anti-cheating strategy is a short-term solution, which can either be replaced by  
280 another, yet unknown strategy linked to hyper OFF phenotype, or followed by tragedy of the  
281 commons. As recently demonstrated, alternative EPS-independent biofilm formation strategies  
282 can emerge by single amino acid change is TasA (47). It remains to be discovered whether shifts  
283 in phenotypic heterogeneity in response to long term cheating is general phenomenon that  
284 applies to different types of public goods.

285

## 286 **MATERIALS AND METHODS**

### 287 **Bacterial strains and culture conditions**

288 Strain *B. subtilis* 168  $P_{\text{hyperspank}}\text{-mKATE } P_{\text{eps}}\text{-GFP}$  (TB869) was obtained by transforming the  
289 laboratory strain, *B. subtilis* 168  $P_{\text{hyperspank}}\text{-mKATE}$  (TB49) (10, 18), with genomic DNA from  
290 NRS2243 ( $\text{sacA}::P_{\text{epsA}}\text{-gfp(Km)hag}::\text{cat}$ ) and selecting for Km resistance. The  $\Delta\text{rsiX}$  strain with  
291 fluorescence reporters (TB959) was obtained by transforming TB869 with genomic DNA isolated  
292 from BKE23090 (168  $\text{trpC2 } \Delta\text{rsiX}::\text{erm}$ ) (48). Strains were maintained in LB medium (Lysogeny  
293 Broth (Lennox), Carl Roth, Germany), while 2×SG medium was used for biofilm induction (10).  
294 The  $\Delta\text{eps}$  strains (TB608) was created previously (10).

295

### 296 **Experimental evolution**

297 Eight biological replicates of the co-cultures of 1:1 ratio of *B. subtilis* TB869 and TB608 were  
298 grown in 48-well plate containing 1ml 2×SG medium at 30°C for two days. Pellicles were  
299 harvested into Eppendorf tubes containing 500  $\mu\text{l}$  sterile 2×SG medium and 100  $\mu\text{l}$  of sterile glass  
300 sand, vortexed for 90 seconds, 10  $\mu\text{l}$  fraction was transferred into 1ml 2×SG medium of a 48 well  
301 plate, and incubated at 30°C static condition for two days. This cycle was continuously repeated  
302 35 times. As control, four biological replicates of mono-cultures of *B. subtilis* TB869 were evolved  
303 using the same transfer method. Every 5<sup>th</sup> transfer cycle, harvested cultures were mixed with  
304 15% glycerol and stored at -80°C.

305

### 306 **Population ratio assay**

307 At every 5<sup>th</sup> transfer, pellicle biofilm productivities and relative frequencies of mutants and WT  
308 were qualitatively assessed (colony forming units (CFU)/ml) using LB agar containing selective  
309 antibiotics. LB agar plates were incubated at 37°C for 16 hours and colonies were counted. Three  
310 single clones of WT and of  $\Delta eps$  per population per timepoint were isolated from plates and  
311 stored at -80°C in the presence of 15% glycerol.

312

### 313 **Quantitative assessment of hyper ON and hyper OFF populations**

314 Ninety-five single isolates of ancestor or evolved TB869 strains obtained from the population per  
315 timepoint were allowed to form pellicles in 96-well PCR plate containing 100 $\mu$ l 2 $\times$ SG medium.  
316 After incubation at 30°C for 24 hours, the plate was vortexed for 90 seconds, bath sonicated  
317 (mini ultrasonic bath, Carl Roth, Germany) for 5 minutes and fluorescence was recorded using  
318 TECAN Infinite F200 PRO microplate reader (excitation at 485/20 nm and emission at 535/10 nm  
319 for GFP; excitation at 590/20 nm and emission at 635/35 nm for RFP; using manual gain of 35  
320 and 50 for GFP and RFP, respectively). Hyper ON and hyper OFF phenotypes were categorized  
321 based on cut off value of the WT ancestor mean  $\pm$  1SD. GFP intensity values above 134 arbitrary  
322 units (AU) were considered as hyper ON and values below 70 AU were categorized as hyper OFF.

323

### 324 **Pellicle competition assay**

325 Pellicles grown from 1:1 ratio of competing strains and incubated for two days were subjected  
326 to competition assay as previously described (10).

327

### 328 **Qualitative assessment of Hyper ONs and Hyper OFFs via microscopy**

329 Single clones of WT obtained from population ratio assay were allowed to form 1-day old pellicle.  
330 Harvested pellicles were subjected to microscopic analysis using an Axio Observer 780 Laser

331 Scanning Confocal Microscope (Carl Zeiss) equipped with a Plan-Apochromat 63×/1.4 Oil DIC  
332 M27 objective, an argon laser for stimulation of fluorescence (excitation at 488 for green  
333 fluorescence and 561 nm for red fluorescence, with emission at 528/26 nm and 630/32 nm  
334 respectively). Zen 2012 Software (Carl Zeiss) and FIJI Image J Software (49) were used for image  
335 recording and processing, respectively.

336

### 337 **Genome re-sequencing and genome analysis**

338 Genomic DNA of single clones from selected evolved populations were isolated using Bacterial  
339 and Yeast Genomic DNA kit (EURx) directly from  $-80^{\circ}\text{C}$  stocks grown in LB medium for 5 hours at  
340  $37^{\circ}\text{C}$  with shaking at 220 rpm. For population sequencing analysis, approx. 100 colonies  
341 belonging to the evolved populations were harvested into 2ml LB broth and incubated at  $37^{\circ}\text{C}$   
342 shaking at 220 rpm for 2-3 hours. Re-sequencing was performed on an Illumina NextSeq  
343 instrument using V2 sequencing chemistry (2x150 nt). Base-calling was carried out with  
344 “bcl2fastq” software (v.2.17.1.14, Illumina). Paired-end reads were further analyzed in CLC  
345 Genomics Workbench Tool 9.5.1. Reads were quality-trimmed using an error probability of 0.05  
346 (Q13) as the threshold. Reads that displayed  $\geq 80\%$  similarity to the reference over  $\geq 80\%$  of their  
347 read lengths were used in mapping. Quality-based SNP and small In/Del variant calling was  
348 carried out requiring  $\geq 10\times$  read coverage with  $\geq 25\%$  variant frequency. Only variants supported  
349 by good quality bases ( $Q \geq 30$ ) on both strands were considered. Gene functions (product names)  
350 in *SI Appendix* Datasets were reported based on SubtiWiki (50).

351

### 352 **Acknowledgements**

353 This work was funded by the Deutsche Forschungsgemeinschaft (DFG) to Á.T.K. (KO4741/2.1)  
354 within the Priority Program SPP1617. M.M. was supported a FEMS Research and Training Grant  
355 (FEMS-RG-2017-0054). A.D. has received funding from the European Union's Horizon 2020  
356 research and innovation programme under the Marie Skłodowska-Curie grant agreement no.

357 713683 (H.C. Ørsted COFUND). Work in the laboratory of Á.T.K. is supported by a DTU startup  
358 fund and partly by the Danish National Research Foundation (DNRF137) for the Center for  
359 Microbial Secondary Metabolites.

360

361 **Authors contributions**

362 Á.T.K. conceived the project, M.M., A.D., and D.S. performed the experiments. G.M contributed  
363 with methods. M.M., A.D. and Á.T.K. wrote the manuscript, with all authors contributing to the  
364 final version.

365 **REFERENCES**

- 366 1. Bourke A (2011) *Principals of social evolution: Oxford series in ecology and evolution*.  
367 (Oxford University Press, Oxford, UK).
- 368 2. Diard M, et al. (2013) Stabilization of cooperative virulence by the expression of an  
369 avirulent phenotype. *Nature* 494:353–356.
- 370 3. Nadell CD, Xavier JB, Foster KR (2009) The sociobiology of biofilms. *FEMS Microbiol Rev*  
371 33:206–224.
- 372 4. West SA, Diggle SP, Buckling A, Gardner A, Griffin AS (2007) The social lives of microbes.  
373 *Annu Rev Ecol Evol Syst* 38:53–77.
- 374 5. West S a., Griffin AS, Gardner A (2007) Evolutionary explanations for cooperation. *Curr*  
375 *Biol* 17:661–672.
- 376 6. Xavier J, Foster KR (2007) Cooperation and conflict in microbial biofilms. *Proc Natl Acad*  
377 *Sci USA* 104:876–881.
- 378 7. Luján AM, Gómez P, Buckling A (2015) Siderophore cooperation of the bacterium  
379 *Pseudomonas fluorescens* in soil. *Biol Lett* 11:20140934.
- 380 8. Weigert M, Kümmerli R (2017) The physical boundaries of public goods cooperation  
381 between surface-attached bacterial cells. *Proc R Soc B Biol Sci* 284:20170631.
- 382 9. Dragoš A, Kovács ÁT (2017) The peculiar functions of the bacterial extracellular matrix.  
383 *Trends Microbiol* 25:257–266.
- 384 10. Martin M, et al. (2017) *De novo* evolved interference competition promotes the spread  
385 of biofilm defectors. *Nat Commun* 8:15127.
- 386 11. Folse HJ, Allison SD (2012) Cooperation, competition, and coalitions in enzyme-  
387 producing microbes: Social evolution and nutrient depolymerization rates. *Front*  
388 *Microbiol* 3:338.
- 389 12. Popat R, et al. (2012) Quorum-sensing and cheating in bacterial biofilms. *Proc R Soc B*  
390 *Biol Sci* 279:4765–4771.



- 391 13. Dogsa I, Oslizlo A, Stefanic P, Mandic-mulec I (2014) Social interactions and biofilm  
392 formation in *Bacillus subtilis*. *Food Technol Biotechnol* 52:149–157.
- 393 14. O'Brien S, Luján AM, Paterson S, Cant MA, Buckling A (2017) Adaptation to public goods  
394 cheats in *Pseudomonas aeruginosa*. *Proc R Soc B Biol Sci* 284:20171089.
- 395 15. Kümmerli R, et al. (2015) Co-evolutionary dynamics between public good producers and  
396 cheats in the bacterium *Pseudomonas aeruginosa*. *J Evol Biol* 28:2264–2274.
- 397 16. Harrison F (2013) Dynamic social behaviour in a bacterium: *Pseudomonas aeruginosa*  
398 partially compensates for siderophore loss to cheats. *J Evol Biol* 26:1370–1378.
- 399 17. Hamilton WD (1964) The genetical evolution of social behaviour. I. *J Theor Biol* 7(1):1–16.
- 400 18. van Gestel J, Weissing FJ, Kuipers OP, Kovács ÁT (2014) Density of founder cells affects  
401 spatial pattern formation and cooperation in *Bacillus subtilis* biofilms. *ISME J* 8:2069–  
402 2079.
- 403 19. Nadell CD, Foster KR, Xavier JB (2010) Emergence of spatial structure in cell groups and  
404 the evolution of cooperation. *PLoS Comput Biol* 6:e1000716.
- 405 20. Momeni B, Waite AJ, Shou W (2013) Spatial self-organization favors heterotypic  
406 cooperation over cheating. *Elife* 2:e00960.
- 407 21. Dragoš A, et al. (2018) Evolution of exploitative interactions during diversification in  
408 *Bacillus subtilis* biofilms. *FEMS Microbiol Ecol* 94:fix155.
- 409 22. Ellis CN, Traverse CC, Mayo-Smith L, Buskirk SW, Cooper VS (2015) Character  
410 displacement and the evolution of niche complementarity in a model biofilm  
411 community. *Evolution (N Y)* 69:283–293.
- 412 23. Poltak SR, Cooper VS (2011) Ecological succession in long-term experimentally evolved  
413 biofilms produces synergistic communities. *ISME J* 5:369–378.
- 414 24. Goymer P, et al. (2006) Adaptive divergence in experimental populations of  
415 *Pseudomonas fluorescens*. II. Role of the GGDEF regulator WspR in evolution and  
416 development of the wrinkly spreader phenotype. *Genetics* 173:515–526.

- 417 25. Rainey PB, Rainey K (2003) Evolution of cooperation and conflict in experimental  
418 bacterial populations. *Nature* 425:72–74.
- 419 26. West SA, Griffin AS, Gardner A, Diggle SP (2006) Social evolution theory for  
420 microorganisms. *Nat Rev Microbiol* 4:597–607.
- 421 27. Hardin G (1968) The tragedy of the commons. *Science (80- )* 162(June):1243–1248.
- 422 28. Martin M, Hölscher T, Dragoš A, Cooper VS, Kovács ÁT (2016) Laboratory evolution of  
423 microbial interactions in bacterial biofilms. *J Bacteriol* 198:2564–2571.
- 424 29. Traverse CC, Mayo-Smith LM, Poltak SR, Cooper VS (2013) Tangled bank of  
425 experimentally evolved *Burkholderia* biofilms reflects selection during chronic infections.  
426 *Proc Natl Acad Sci U S A* 110:E250-9.
- 427 30. Madsen JS, et al. (2015) Facultative control of matrix production optimizes competitive  
428 fitness in *Pseudomonas aeruginosa* PA14 biofilm models. *Appl Environ Microbiol*  
429 81:8414–8426.
- 430 31. Rainey PB, Travisano M (1998) Adaptive radiation in a heterogeneous environment.  
431 *Nature* 394:69–72.
- 432 32. Kreft JU (2004) Biofilms promote altruism. *Microbiology* 150:2751–2760.
- 433 33. Lyons NA, Kolter R (2018) A single mutation in rapP induces cheating to prevent cheating  
434 in *Bacillus subtilis* by minimizing public good production. *Commun Biol* 1:133.
- 435 34. Veening JW, et al. (2008) Transient heterogeneity in extracellular protease production by  
436 *Bacillus subtilis*. *Mol Syst Biol* 4:1–15.
- 437 35. Davidson FA, Seon-Yi C, Stanley-Wall NR (2012) Selective heterogeneity in exoprotease  
438 production by *Bacillus subtilis*. *PLoS One* 7:e38574.
- 439 36. Hölscher T, et al. (2015) Motility, chemotaxis and aerotaxis contribute to  
440 competitiveness during bacterial pellicle biofilm development. *J Mol Biol* 427:3695–  
441 3708.
- 442 37. Dragoš A, et al. (2018) Division of labor during biofilm matrix production. *Curr Biol*

- 443 28:1903–1913.
- 444 38. Chai Y, Chu F, Kolter R, Losick R (2008) Bistability and biofilm Formation in *Bacillus*  
445 *subtilis*. *Mol Microbiol* 67:254–263.
- 446 39. Helmann JD (2016) *Bacillus subtilis* extracytoplasmic function (ECF) sigma factors and  
447 defense of the cell envelope. *Curr Opin Microbiol* 30:122–132.
- 448 40. Chu F, et al. (2004) A master regulator for biofilm formation by *Bacillus subtilis*. *Mol*  
449 *Microbiol* 55(3):739–749.
- 450 41. Cao M, Helmann JD (2004) The *Bacillus subtilis* extracytoplasmic-function  $\sigma$ X factor  
451 regulates modification of the cell envelope and resistance to cationic antimicrobial  
452 peptides. *J Bacteriol* 186(4):1136–1146.
- 453 42. Murray EJ, Strauch M a, Stanley-Wall NR (2009) SigmaX is involved in controlling *Bacillus*  
454 *subtilis* biofilm architecture through the AbrB homologue Abh. *J Bacteriol* 191:6822–  
455 6832.
- 456 43. Hentzer M, et al. (2001) Alginate overproduction affects *Pseudomonas aeruginosa*  
457 biofilm structure and function. *J Bacteriol* 183(18):5395–401.
- 458 44. Subramaniam AR, et al. (2013) A serine sensor for multicellularity in a bacterium. *Elife*  
459 2013:1–17.
- 460 45. Stöver AG, Driks A (1999) Secretion, localization, and antibacterial activity of TasA, a  
461 *Bacillus subtilis* spore-associated protein. *J Bacteriol* 181:1664–1672.
- 462 46. Dragoš A, Kovács ÁT, Claessen D (2017) The role of functional amyloids in multicellular  
463 growth and development of Gram-positive bacteria. *Biomolecules* 7:60.
- 464 47. Dragoš A, et al. (2018) Collapse of genetic division of labour and evolution of autonomy  
465 in pellicle biofilms. 3:1451–1460.
- 466 48. Koo BM, et al. (2017) Construction and analysis of two genome-scale deletion libraries  
467 for *Bacillus subtilis*. *Cell Syst* 4:291–305.e7.
- 468 49. Rueden CT, et al. (2017) ImageJ2: ImageJ for the next generation of scientific image data.

469 *BMC Bioinformatics* 18:529.

470 50. Zhu B, Stülke J (2018) SubtiWiki in 2018: From genes and proteins to functional network  
471 annotation of the model organism *Bacillus subtilis*. *Nucleic Acids Res* 46:D743–D748.

472

473

474 **Figure legends**

475 **Fig. 1.** Population dynamics over the course of experimental evolution for eight parallel pellicle  
476 populations. Productivity (total CFU/ml) and cheater frequency (%) in the pellicle obtained from  
477 plate count assay (CFU/ml) for every 5th transfer starting from the initial count prior to incubation  
478 until 35 transfers.

479  
480 **Fig. 2.** Quantitative assessment of hyper ONs and hyper OFFs present per evolved population.  
481 Percentage of isolates >134 AU value expressing high intensity level of  $P_{eps}$ -GFP (hyper ON) and  
482 low intensity value of < 70 AU (hyper OFF) for WT evolved and non-evolved strains per timepoint  
483 from 5th to 35th transfer for all 8 populations evolved with cheaters and 4 populations evolved  
484 alone (n=95). Cut off based on the mean  $\pm$  1SD of WT ancestor strain taken at six different days  
485 (n=336).

486  
487 **Fig. 3.** Qualitative assessment of *eps* gene expression based on confocal laser scanning  
488 microscopy showing  $\Delta rsiX$  phenotype similar to strains that were co-evolved with cheaters.  
489 Pellicles formed by single clones of evolved or *rsiX* mutated TB869 belonging to (A) population  
490 C1 evolved alone at 5<sup>th</sup>, 30<sup>th</sup> and 35<sup>th</sup> timepoint showing Hyper OFF phenotype (B) WT ancestor  
491 demonstrating heterogeneous expression (C)  $\Delta rsiX$  exhibiting hyper ON phenotype similar to (D)  
492 evolved with cheaters Pop 3 (5<sup>th</sup> and 10<sup>th</sup>) and Pop 7 (30<sup>th</sup>) viewed under the confocal laser  
493 scanning microscope. Cells constitutively expressing mKATE are represented in magenta and *eps*-  
494 expressing cells are shown in green. Scale bar represents 10 $\mu$ m.

495  
496 **Fig. 4.** (A) Pellicle competition assay of single clones belonging to producer populations (non-  
497 evolved (n=9),  $\Delta rsiX$  (n=8), evolved with (n=4) and without cheaters (n=4)) against  $\Delta eps$  ancestor  
498 and (B) corresponding pellicle productivity based on total CFU/ml. Mean is represented in square  
499 inside the box plots; whiskers represent the minimum and maximum; single dots represent the

500 individual data points (n); asterisk (\*) represents the significant difference from the WT ancestor  
501 ANOVA (P value 0.05).

502

503 **Fig. 5.** Pellicle competition assay against evolved cheater with *sinR*<sup>WT</sup> (left) and *sinR*<sup>Leu1Trp</sup> (right)  
504 (n=4) on single clones of producers (non-evolved, evolved with and without cheaters). Mean is  
505 represented in square; whiskers represent the minimum and maximum; single dots represent  
506 the individual data points (n); asterisk (\*) represents the significant difference ANOVA (P value  
507 0.05).

508

509 **Fig. 6.** Figure summary showing the population dynamics based on producer and cheater  
510 frequency per population from 5th transfer to 35th transfers for populations evolved with  
511 cheaters with collapse (Pop 1, 2, 3, 4, 6 and 7), without collapse (Pop 5 and 8), and populations  
512 evolved without cheaters (C1, C2, C3, C4) with indications of phenotypes based on hyper ON,  
513 hyper OFF or heterogenous *eps*-expression. Key mutations on single clone level of evolved WT  
514 and evolved  $\Delta eps$  or population level are specified. *rsiX*\* mutation is not similar to mutation  
515 observed in strains evolved with cheaters.

516

**Decline – recovery - collapse**

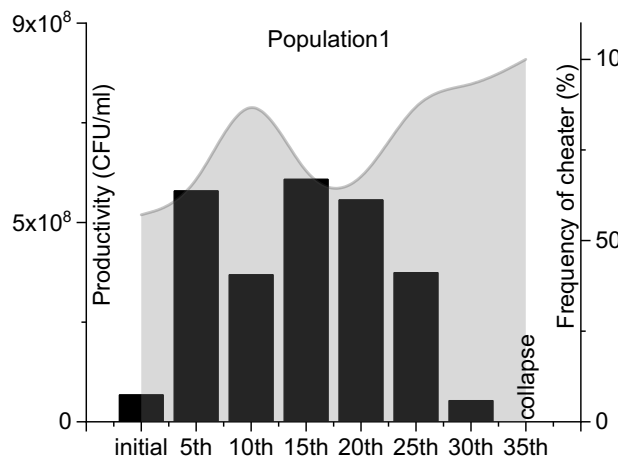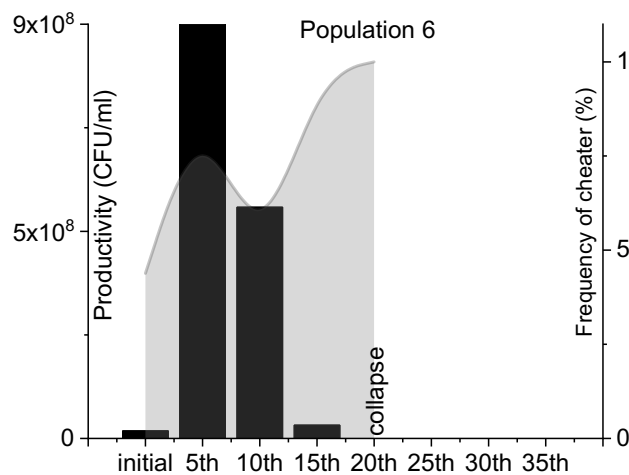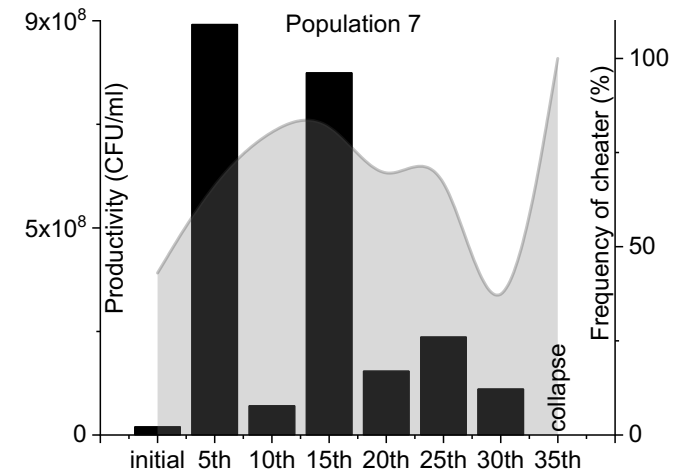

**Decline - collapse**

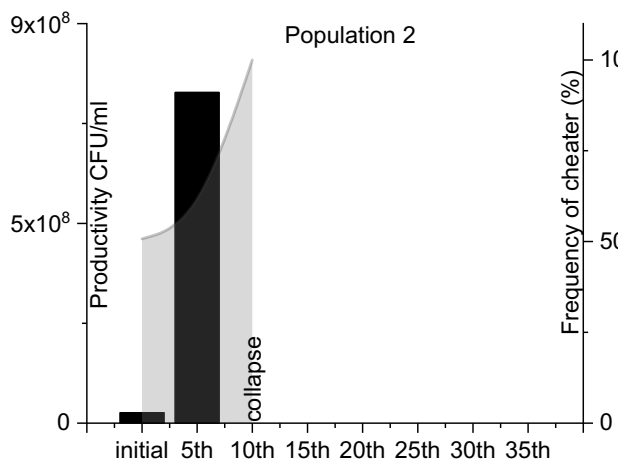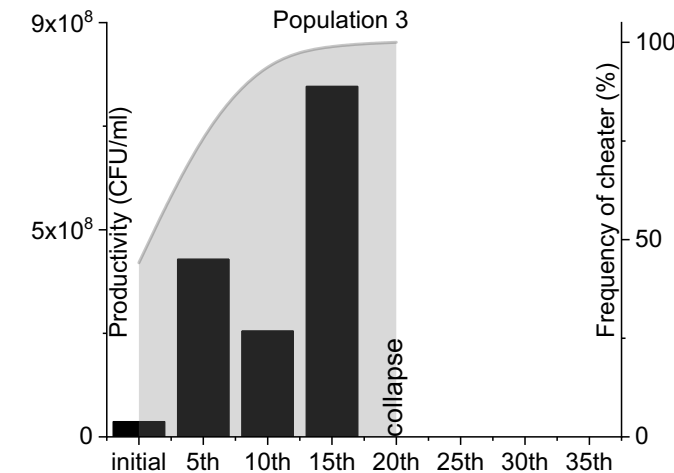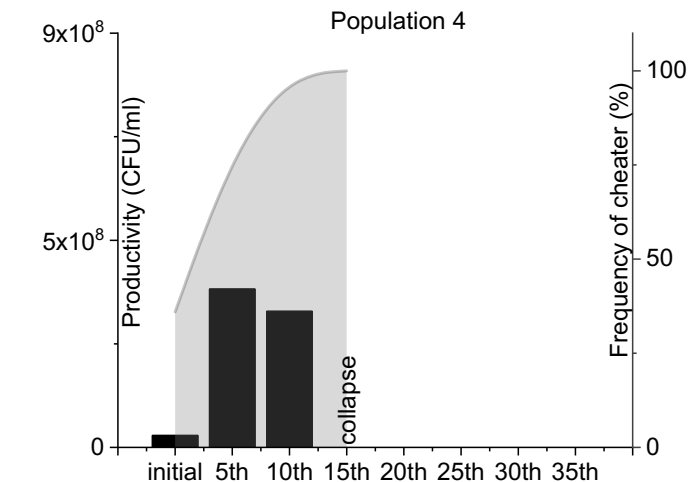

**Decline – recovery – no collapse**

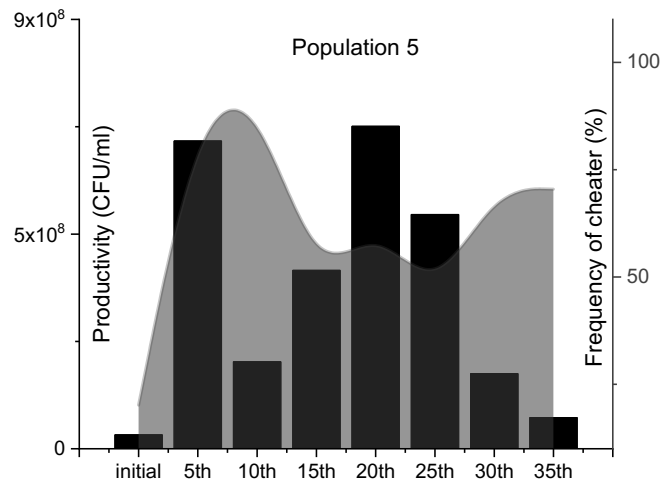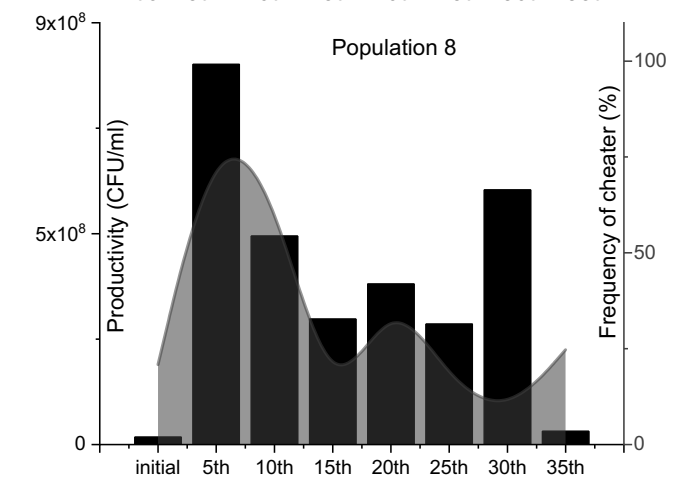

 Productivity – Total CFU/ml  
 Frequency of cheater in pellicle (%)

# Co-evolved w/ cheaters

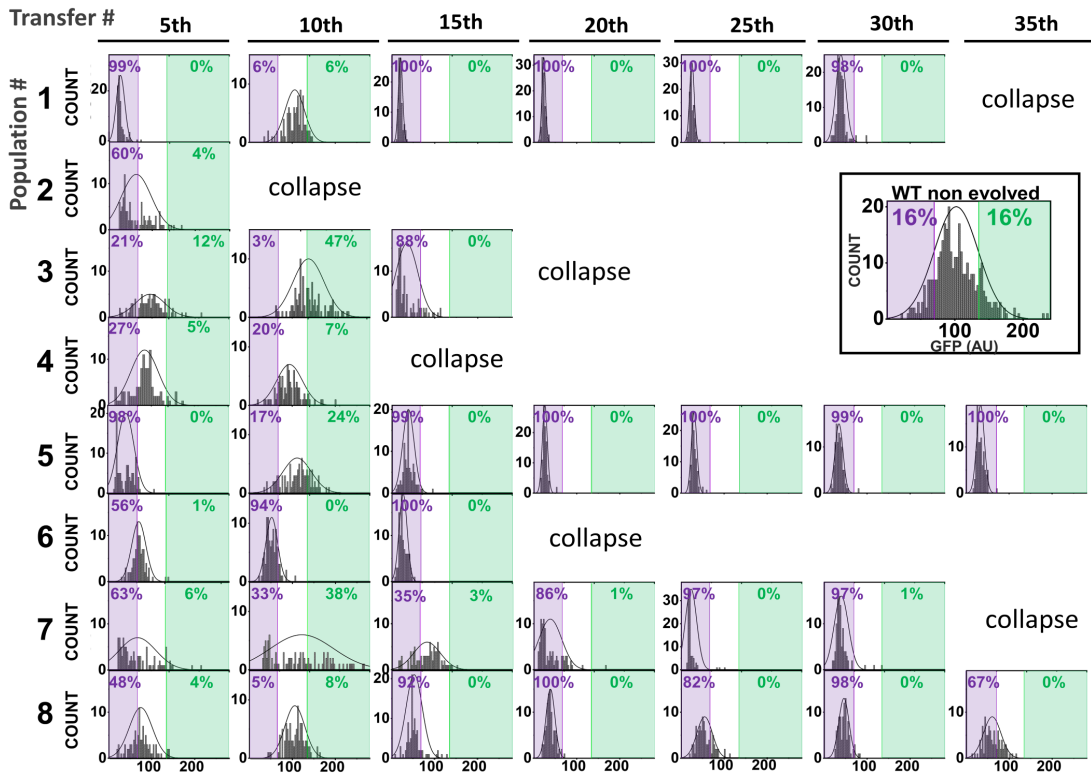

# Evolved w/o cheaters

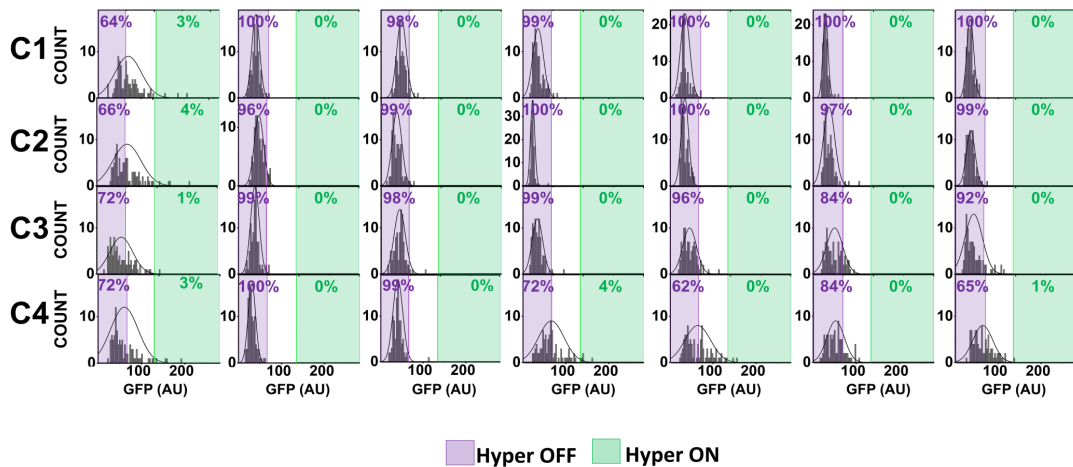



**A)****Evolved w/o cheaters**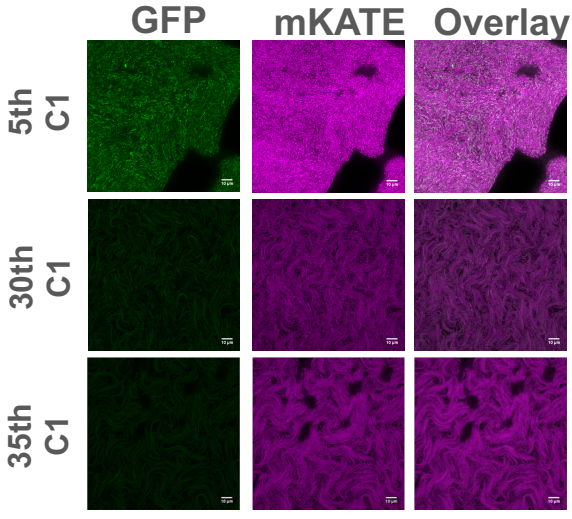**B)****WT ancestor**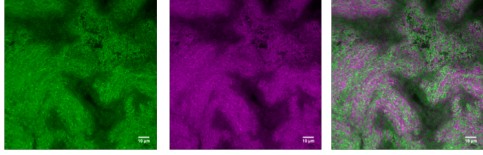**C)** **$\Delta$ *rsiX***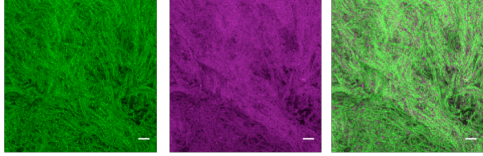**D)****Evolved w/ cheaters**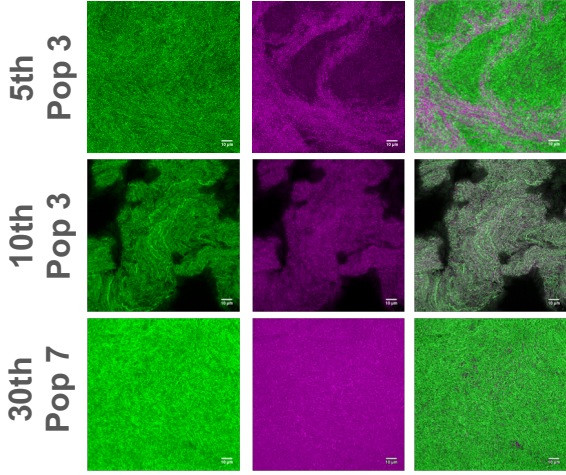

**A)****vs non-evolved  $\Delta eps$** 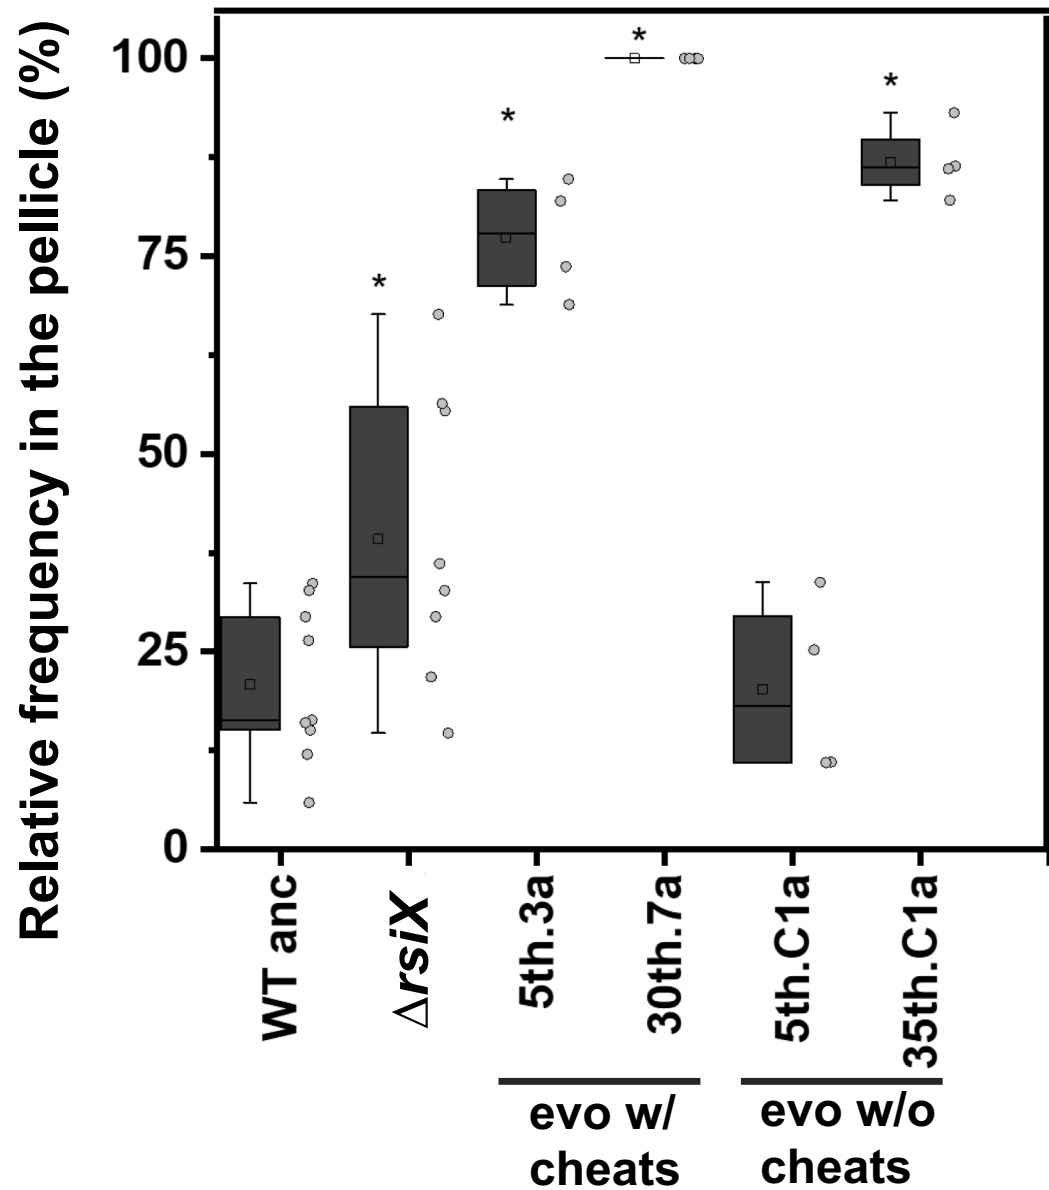**B)****Co-cultured with non-evolved  $\Delta eps$** 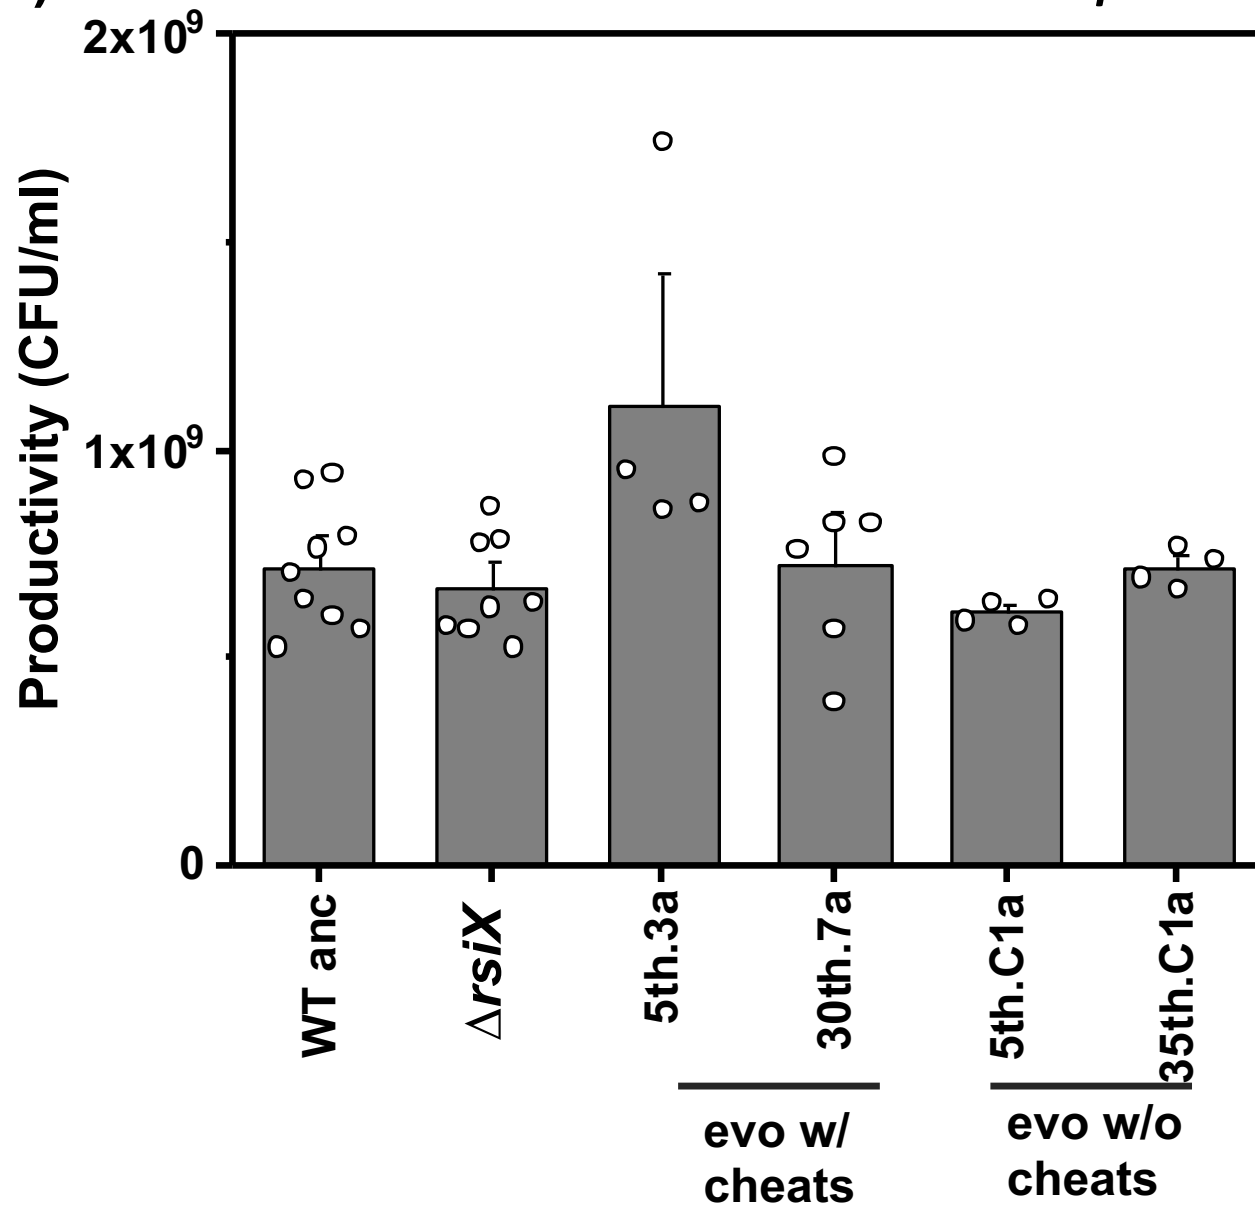

vs evolved  $\Delta eps$

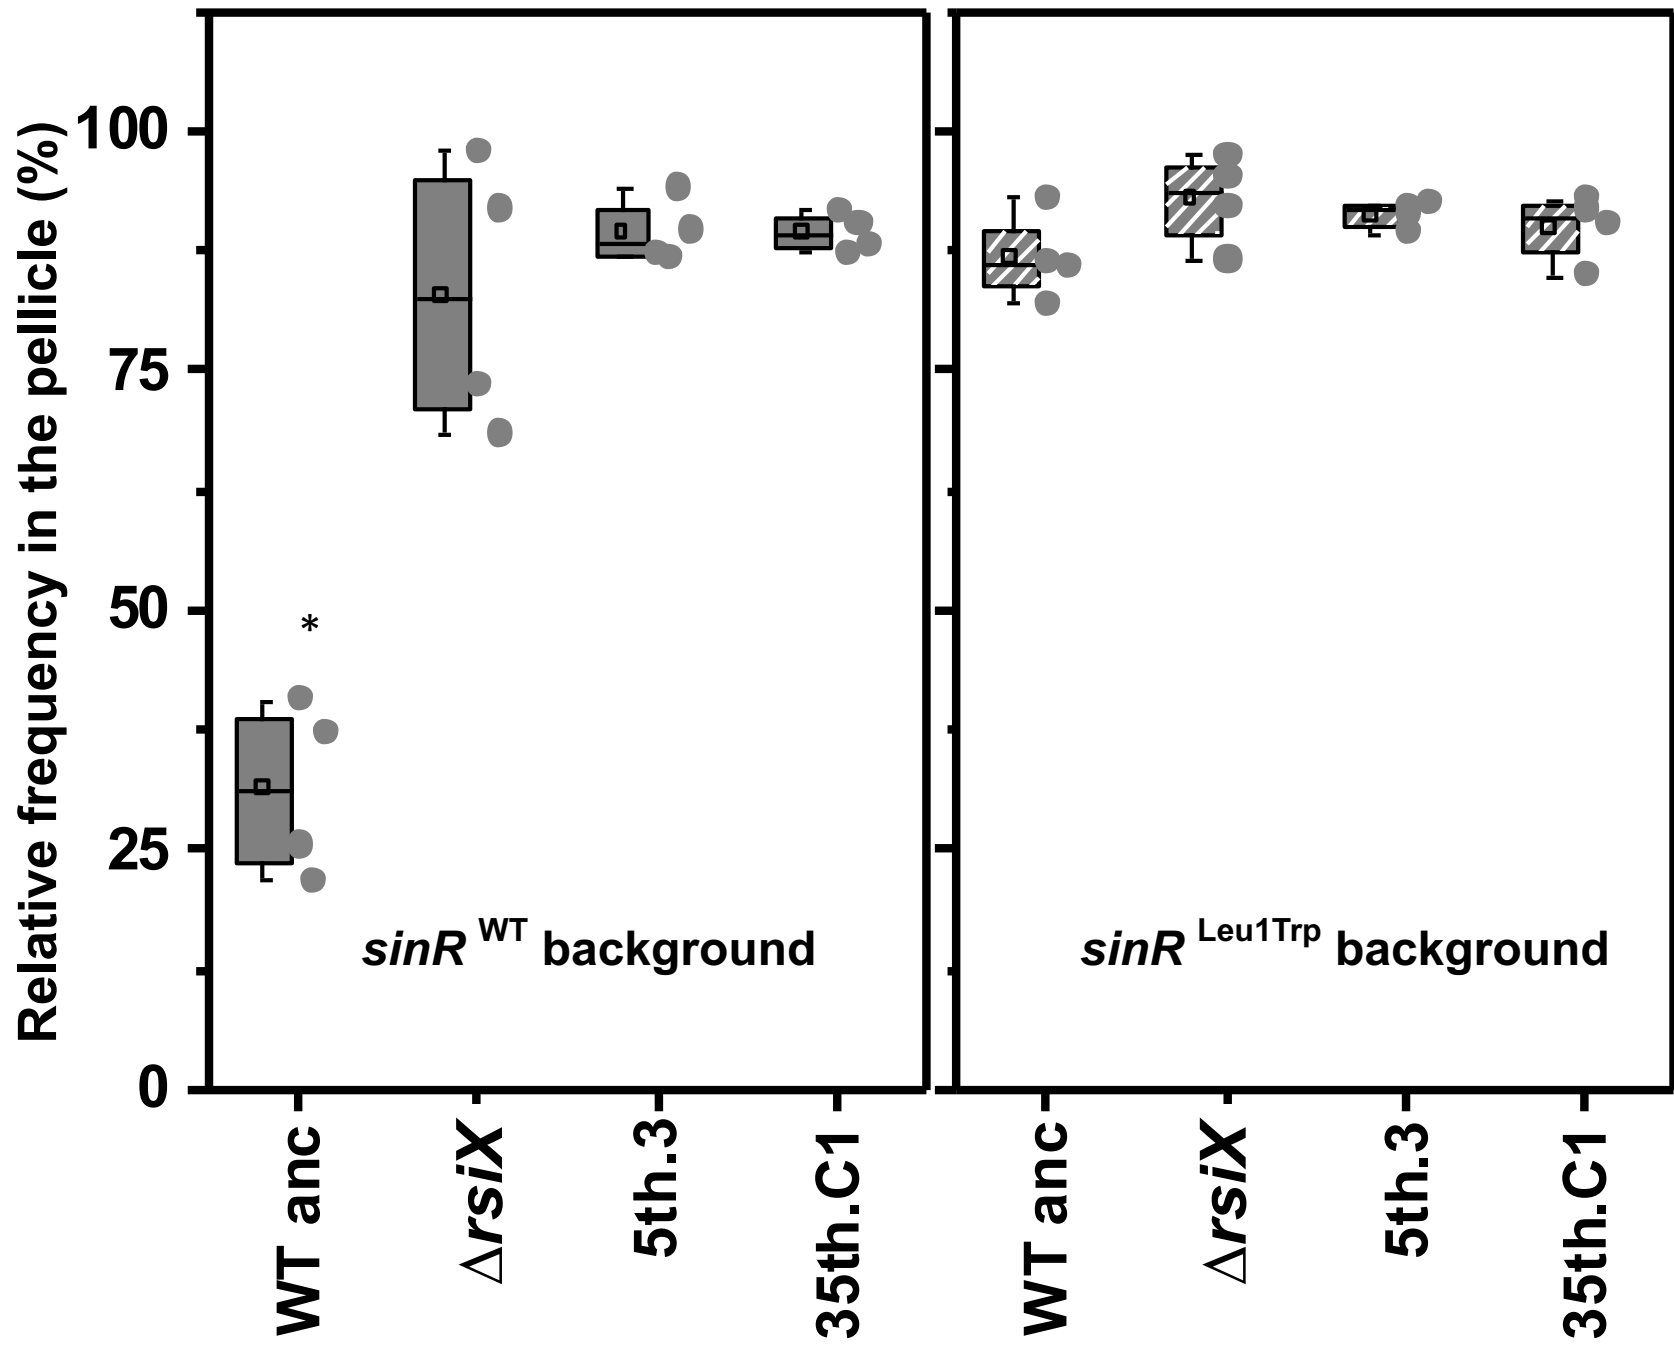

**Evolved with cheaters :**

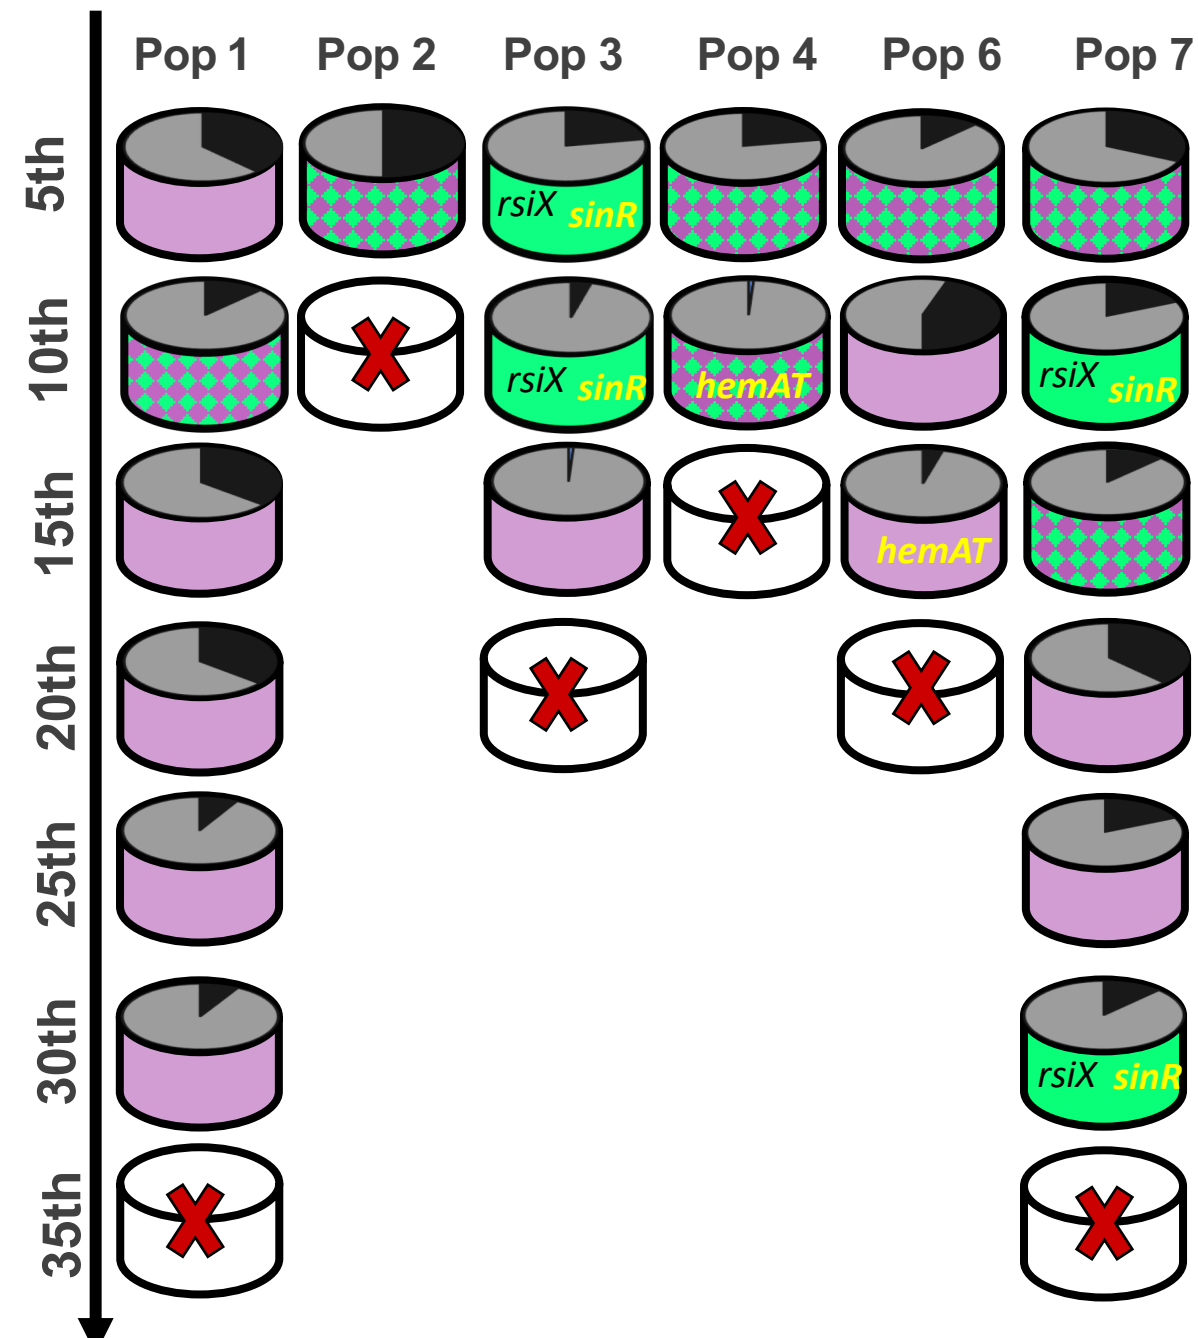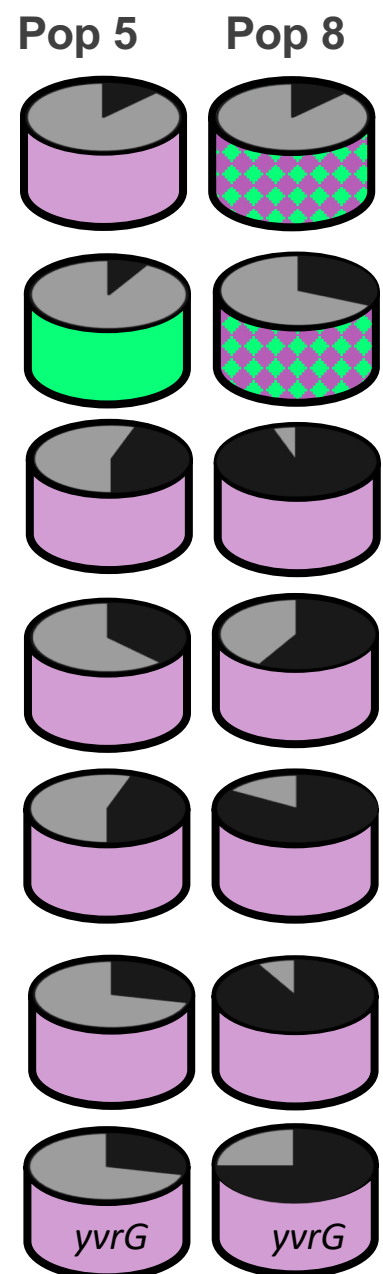

**Evolved without cheaters:**

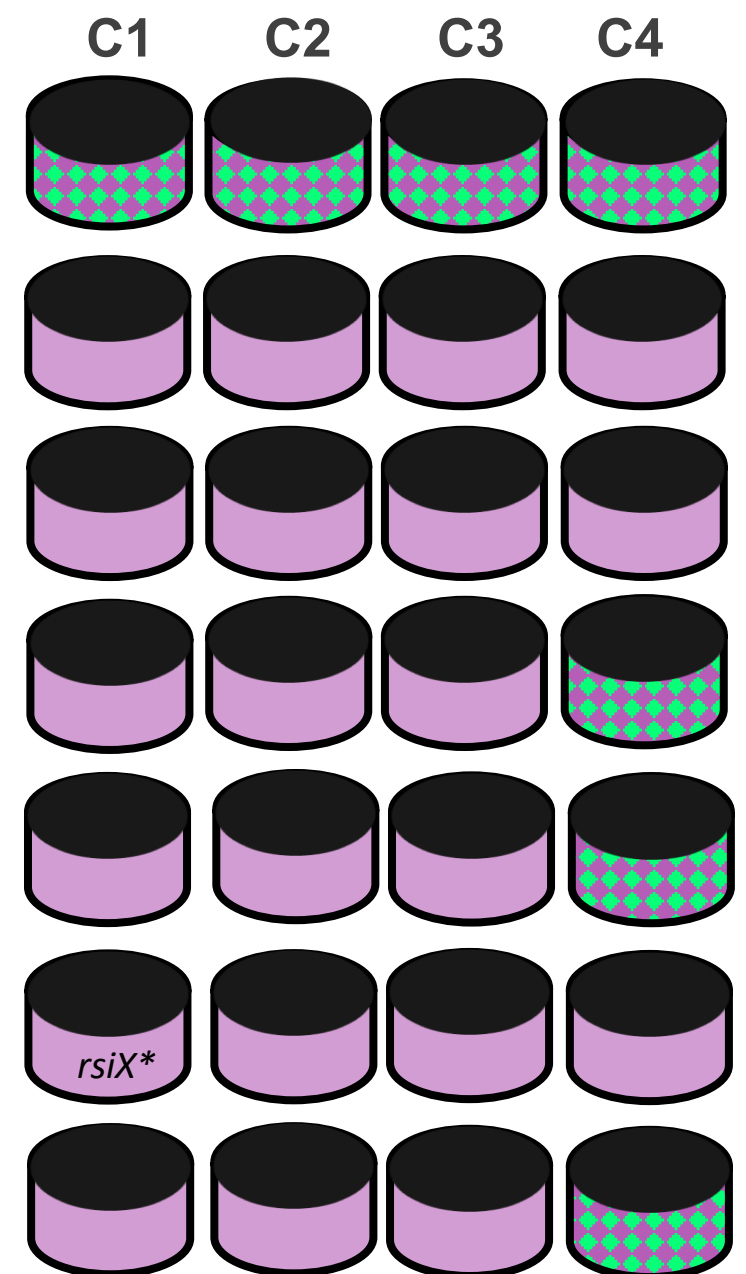

**LEGEND:**

**eps expression in WT**

- Heterogeneous
- Hyper OFF
- Hyper ON

**Population frequency**

- WT
- $\Delta eps$
- collapse

**Key mutations:**

- $\Delta eps$
- WT
